# Supplementary material for: Novel (4,8)-connected scu coordination framework constructed by tetrakis(4-benzoic acid)ethylene
Source: Royal Society of Chemistry journal article supplement (doi:10.1039/c2ce26761f), 2012-12-12
Supplement: c2ce26761f.pdf [file c2ce26761f.pdf]

# Novel (4,8)-connected scu Framework Constructed by Tetrakis(4-benzoic acid)ethylene

Hao-Ling Sun<sup>a\*</sup>, Rui Jiang<sup>a</sup>, Zongsheng Li<sup>b</sup>, Yong Qiang Dong<sup>a</sup> and Miao Du<sup>c\*</sup>

<sup>a</sup> *Department of Chemistry and Beijing Key Laboratory of Energy Conversion and Storage Materials, Beijing Normal University, Beijing 100875, P. R. China E-mail: [haolingsun@bnu.edu.cn](mailto:haolingsun@bnu.edu.cn);*

<sup>b</sup> *College of Safety and Environment Engineering, Capital University of Economics and Business, Beijing 100070, People's Republic of China*

<sup>c</sup> *College of Chemistry, Tianjin Key Laboratory of Structure and Performance for Functional Molecule, Tianjin Normal University, Tianjin 300387, P. R. China.*

Supporting Information

## Experimental Section

All the starting materials were commercially available reagents for analytical grade and used without further purification.

**Tetrakis(4-benzoic acid)ethylene·0.5H<sub>2</sub>O (H<sub>4</sub>tbe·0.5H<sub>2</sub>O):** To a solution of tetrakis(4-bromophenyl)ethylene (8.38g, 12.9mmol) in 300 mL of dry THF, n-butyllithium (2.5 M in hexane, 26 ml, 65.0 mol) was added dropwise at -78 °C under N<sub>2</sub>. After addition, the mixture was stirred for another 2 h at -78 °C, and solid carbon dioxide (100 g) was added in portions. The mixture was warmed to room temperature and stirred overnight. The solution was adjusted to pH = 1 with conc. HCl (15 mL) and extracted by mixed solvent of ether and THF to give white solid. A mixture of the white solid, conc. H<sub>2</sub>SO<sub>4</sub> (8.0 mL) and ethanol (250 mL) in a 500 mL three-necked flask was stirred at reflux for 20 h. The resulting solution was concentrated under reduced pressure. The residue was purified by silica gel chromatography to yield 2.62 g (38.6%) of tetraester a white solid. A mixture of

tetraester, sodium hydroxide (3.43 g), ethanol (150 mL) and H<sub>2</sub>O (150 mL) in a 500 mL three-necked flask was stirred at reflux for 20 h. The resulting solution was concentrated under reduced pressure, and the residue was acidified with conc. HCl at 0°C. The precipitate was collected and dried to yield 2.01 g (94%) of tetrakis(4-benzoic acid)ethylene·0.5H<sub>2</sub>O as a white solid. Anal. Calcd for C<sub>30</sub>H<sub>25</sub>O<sub>10.5</sub> (%):C, 65.09; H, 4.55. Found (%):C, 65.31; H, 4.35. Selected IR (KBr, cm<sup>-1</sup>): 3444.4(m), 3175.6(w), 1693.1(s), 1605.8(s), 1410.3(m), 1248.3(m), 1177.8(m), 1105.0(m), 748.6(m).

Table S1 Selected bond lengths (Å) and angles (deg) for **1**.

| Compound <b>1</b> |           |            |           |             |          |
|-------------------|-----------|------------|-----------|-------------|----------|
| Co1-O4            | 2.099(2)  | Co1-O3     | 2.108(17) | Co1-O2b     | 2.087(2) |
| Co1-O2c           | 2.087(2)  | Co1-O1     | 2.101(2)  | Co1-O1a     | 2.101(2) |
| Co1-O3'           | 2.161(17) | Co1-O3'a   | 2.161(17) |             |          |
| O4-Co1-O3         | 174.7(5)  | O4-Co1-O2b | 87.5(3)   | O3-Co1-O2b  | 96.1(3)  |
| O4-Co1-O2c        | 87.5(3)   | O3-Co1-O2c | 96.1(3)   | O2b-Co1-O2c | 90.4(4)  |
| O4-Co1-O1a        | 85.7(3)   | O3-Co1-O1a | 90.7(3)   | O2b-Co1-O1a | 173.2(3) |
| O2c-Co1-O1a       | 88.4(3)   | O4-Co1-O1  | 85.7(3)   | O3-Co1-O1   | 90.7(3)  |
| O2b-Co1-O1        | 88.4(3)   | O2d-Co1-O1 | 173.2(3)  | O1a-Co1-O1  | 92.0(4)  |

Symmetry code : a: x, y, -z+2 b: x-1/2, -y+3/2, z c: x-1/2, -y+3/2, -z+2
